# Supplementary material
Source: publisher site journal article supplement (https://www.dovepress.com/article/508382)
Supplement: Supplementary file 1 [file get_supplementary_file.php]

**Supplementary Figures**


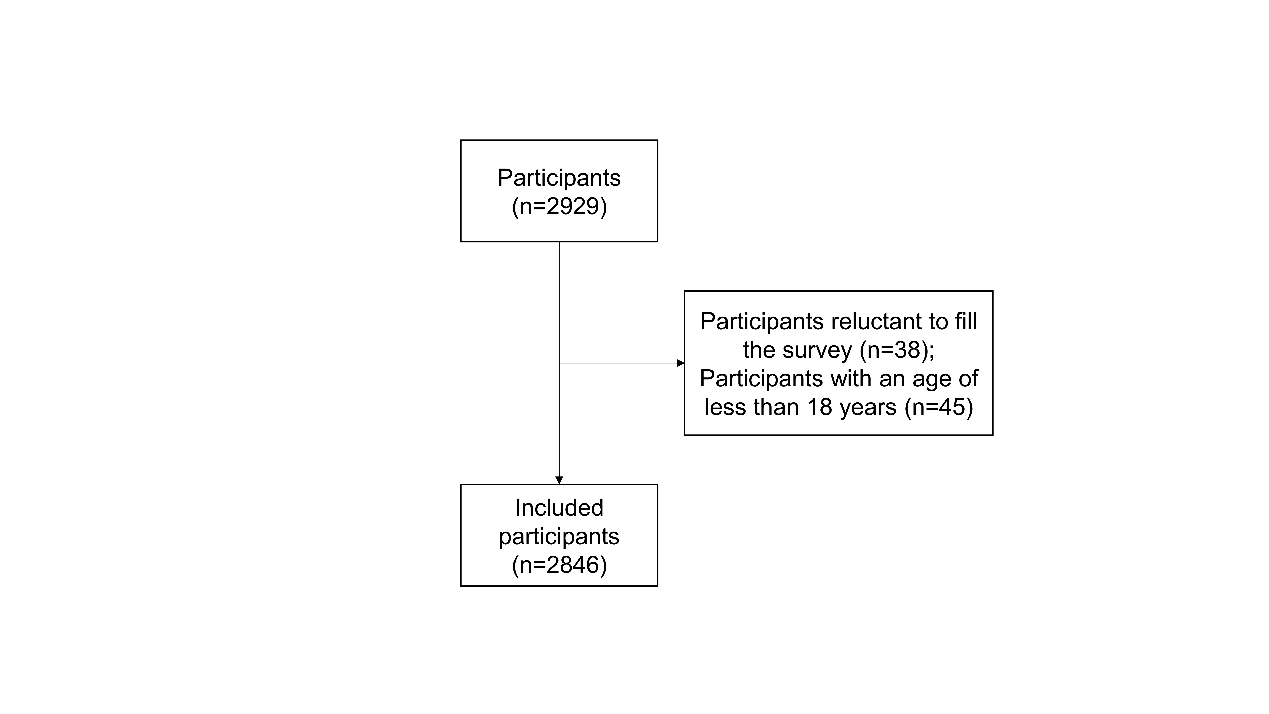


**Supplementary Figure 1:** Participant’s flowchart.


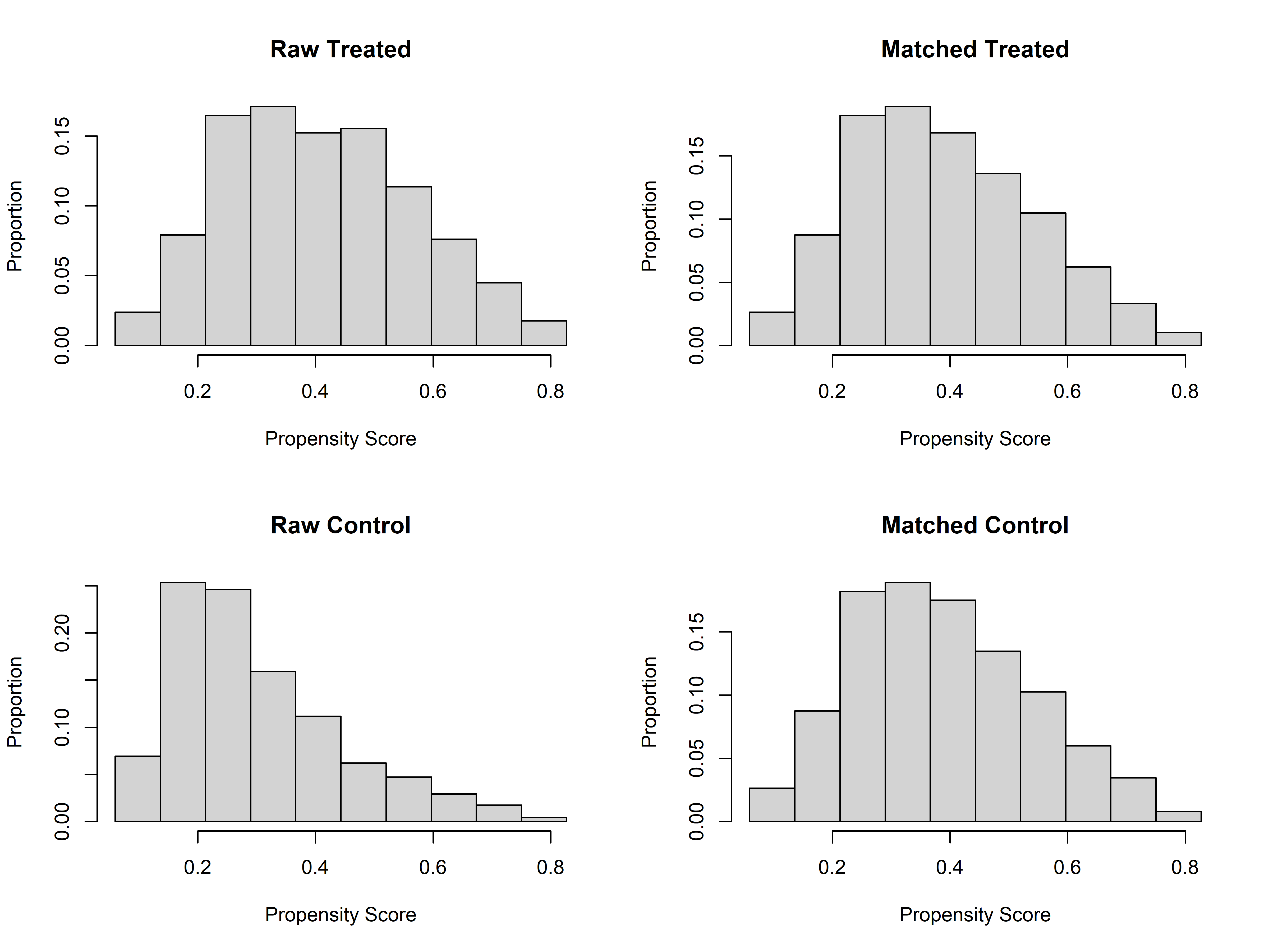


**Supplementary Figure 2:** Distribution of propensity score before and after propensity score matching analysis.
